# Supplementary material for: Molecular beam epitaxy of InAs quantum wells on InP(001) for high mobility two-dimensional electron gases
Source: Royal Society of Chemistry journal article supplement (doi:10.1039/d3ce00010a), 2023-01-01
Supplement: d3ce00010a1.pdf [file d3ce00010a1.pdf]

## Supplementary Information

### Molecular beam epitaxy of InAs quantum wells on InP(001) for high mobility two-dimensional electron gases

Anna Aleksandrova,<sup>a,b</sup> Christian Golz,<sup>a,b</sup> Klaus Biermann,<sup>c</sup> Achim Trampert,<sup>c</sup> Mykhaylo Semtsiv,<sup>a</sup> Helmut Weidlich,<sup>b</sup> William Ted Masselink,<sup>a</sup> and Yukihiro Takagaki<sup>c</sup>

<sup>a</sup>Department of Physics, Humboldt University Berlin, Newton Str. 15, 12489 Berlin, Germany

<sup>b</sup>Institute Kurz GmbH, Stockheimer Weg 1, 50829 Cologne, Germany

<sup>c</sup>Paul Drude Institute for Solid State Electronics, Hausvogteiplatz 5–7, 10117 Berlin, Germany

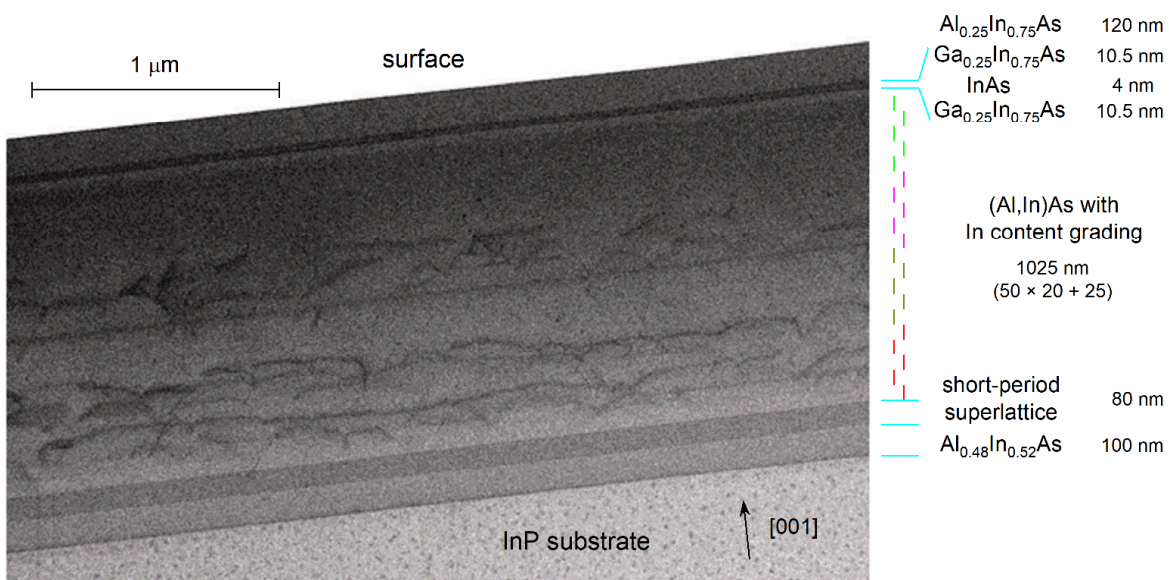

Fig. S1. Z-contrast scanning transmission electron microscopy image of heterostructure grown on InP(001).

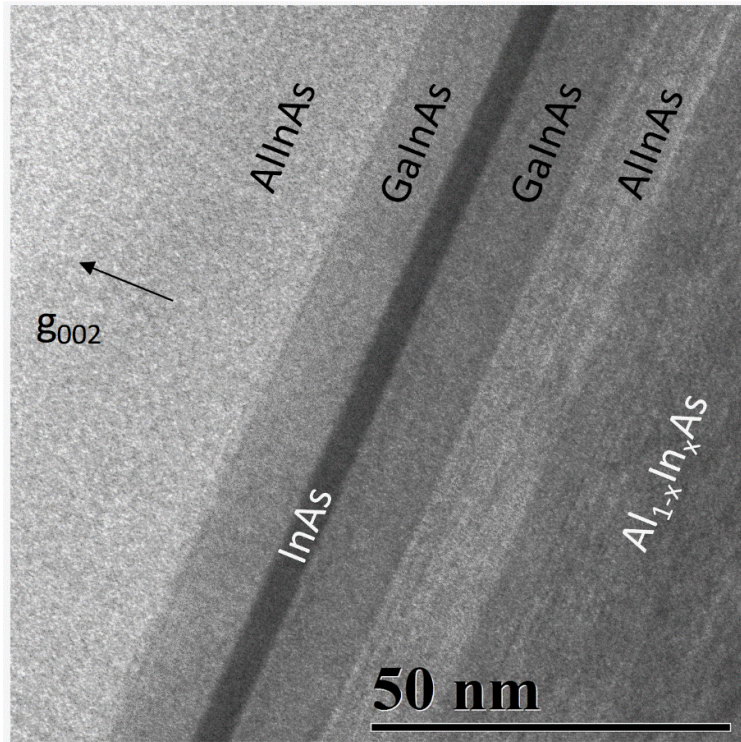

Fig. S2. Bright-field transmission electron microscopy image in 002 two beam condition. The image is sensitive to the difference in atomic scattering factors between group III and group V atoms.
